# Supplementary material for: A general strategy for synthesis of quaternary semiconductor Cu2MSnS4 (M = Co2+, Fe2+, Ni2+, Mn2+) nanocrystals
Source: Royal Society of Chemistry journal article supplement (doi:10.1039/c2jm33574c), 2012-01-01
Supplement: c2jm33574c.pdf [file c2jm33574c.pdf]

Electronic supplementary information

A General Strategy for Synthesis of Quaternary Semiconductor

$\text{Cu}_2\text{MSnS}_4$  ( $\text{M}=\text{Co}^{2+}, \text{Fe}^{2+}, \text{Ni}^{2+}, \text{Mn}^{2+}$ ) Nanocrystals

Yong Cui, Ruiping Deng, Gang Wang,\* Daocheng Pan\*

State Key Laboratory of Rare Earth Resource Utilization, Changchun Institute of Applied  
Chemistry, Chinese Academy of Sciences, Changchun, Jilin, 130022, China

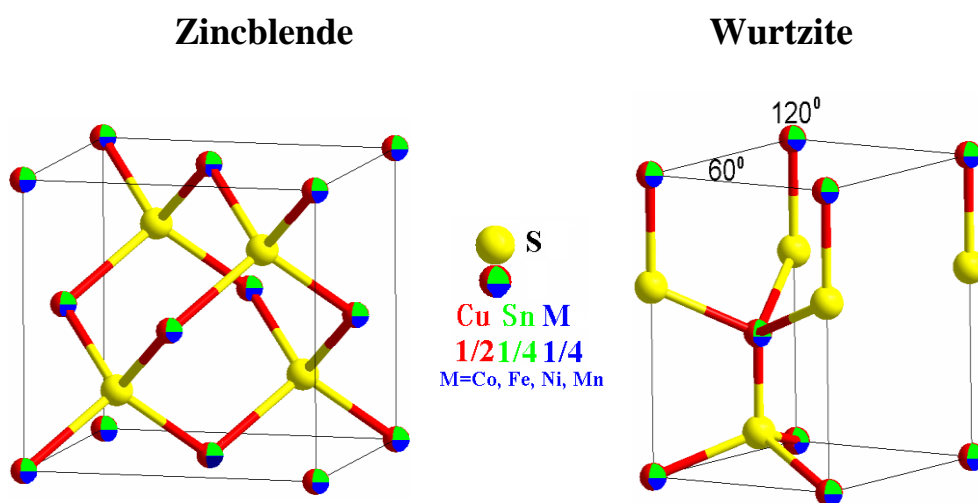

**Figure S1.** Unit cells of zincblende (left) and wurtzite (right)  $\text{Cu}_2\text{MSnS}_4$  ( $\text{M}=\text{Co}, \text{Fe}, \text{Ni}, \text{Mn}$ ).

**Table S1.** Comparison of experimental and simulated XRD peaks for zincblende  $\text{Cu}_2\text{CoSnS}_4$ .

| hkl | Observed $2\theta$ | Simulated $2\theta$ | $\Delta 2\theta$ |
|-----|--------------------|---------------------|------------------|
| 111 | 28.656             | 28.676              | -0.020           |
| 220 | 47.741             | 47.706              | +0.035           |
| 311 | 56.555             | 56.613              | -0.058           |

### **Crystal data**

Formula  $\text{Cu}_2\text{CoSnS}_4$   
Crystal system Zincblende  
Space group  $F-43m$  (No. 216)  
Unit cell dimensions  $a = b = c = 5.3877 \text{ \AA}$

### **Atomic coordinates**

| Atom | Wyck. | x/a | y/b | z/c |
|------|-------|-----|-----|-----|
| S    | 4c    | 1/4 | 1/4 | 1/4 |
| Sn   | 4a    | 0   | 0   | 0   |
| Co   | 4a    | 0   | 0   | 0   |
| Cu   | 4a    | 0   | 0   | 0   |

Note that  $\text{Cu}^+$ ,  $\text{Co}^{2+}$ , and  $\text{Sn}^{4+}$  ions occupy the same position, and the occupancy possibilities of  $\text{Cu}^+$ ,  $\text{Co}^{2+}$ , and  $\text{Sn}^{4+}$  are 1/2, 1/4 and 1/4, respectively.

**Table S2.** Comparison of experimental and simulated XRD peaks for zincblende  $\text{Cu}_2\text{FeSnS}_4$ .

| hkl | Observed $2\theta$ | Simulated $2\theta$ | $\Delta 2\theta$ |
|-----|--------------------|---------------------|------------------|
| 111 | 28.693             | 28.706              | -0.013           |
| 220 | 47.769             | 47.759              | +0.010           |
| 311 | 56.652             | 56.678              | -0.026           |

### **Crystal data**

Formula  $\text{Cu}_2\text{FeSnS}_4$

Crystal system Zincblende

Space group  $F\text{-}43\text{m}$  (No. 216)

Unit cell dimensions  $a = b = c = 5.3821 \text{ \AA}$

### **Atomic coordinates**

| Atom | Wyck. | x/a | y/b | z/c |
|------|-------|-----|-----|-----|
| S    | 4c    | 1/4 | 1/4 | 1/4 |
| Sn   | 4a    | 0   | 0   | 0   |
| Fe   | 4a    | 0   | 0   | 0   |
| Cu   | 4a    | 0   | 0   | 0   |

Note that  $\text{Cu}^+$ ,  $\text{Fe}^{2+}$ , and  $\text{Sn}^{4+}$  ions occupy the same position, and the occupancy possibilities of  $\text{Cu}^+$ ,  $\text{Fe}^{2+}$ , and  $\text{Sn}^{4+}$  are 1/2, 1/4 and 1/4, respectively.

**Table S3.** Comparison of experimental and simulated XRD peaks for wurtzite  $\text{Cu}_2\text{NiSnS}_4$ .

| hkl | Observed $2\theta$ | Simulated $2\theta$ | $\Delta 2\theta$ |
|-----|--------------------|---------------------|------------------|
| 100 | 26.690             | 26.694              | -0.004           |
| 002 | 28.123             | 28.071              | +0.052           |
| 101 | 30.198             | 30.231              | -0.033           |
| 102 | 39.143             | 39.124              | +0.019           |
| 110 | 47.164             | 47.137              | +0.027           |
| 103 | 51.050             | 51.043              | +0.007           |
| 112 | 55.786             | 55.763              | +0.023           |

### Crystal data

Formula  $\text{Cu}_2\text{NiSnS}_4$

Crystal system Wurtzite

Space group  $P6_3mc$  (No. 186)

Unit cell dimensions  $a = b = 3.8530 \text{ \AA}$ ,  $c = 6.3523 \text{ \AA}$

### Atomic coordinates

| Atom | Wyck. | x/a | y/b | z/c    |
|------|-------|-----|-----|--------|
| S    | 2b    | 1/3 | 2/3 | 0      |
| Sn   | 2b    | 1/3 | 2/3 | 0.3752 |
| Ni   | 2b    | 1/3 | 2/3 | 0.3752 |
| Cu   | 2b    | 1/3 | 2/3 | 0.3752 |

Note that  $\text{Cu}^+$ ,  $\text{Ni}^{2+}$ , and  $\text{Sn}^{4+}$  ions occupy the same position, and the occupancy possibilities of  $\text{Cu}^+$ ,  $\text{Ni}^{2+}$ , and  $\text{Sn}^{4+}$  are 1/2, 1/4 and 1/4, respectively.

**Table S4.** Comparison of experimental and simulated XRD peaks for wurtzite  $\text{Cu}_2\text{MnSnS}_4$ .

| hkl | Observed $2\theta$ | Simulated $2\theta$ | $\Delta 2\theta$ |
|-----|--------------------|---------------------|------------------|
| 100 | 26.941             | 26.945              | -0.004           |
| 002 | 28.211             | 28.235              | -0.024           |
| 101 | 30.488             | 30.492              | -0.004           |
| 102 | 39.433             | 39.425              | +0.008           |
| 110 | 47.622             | 47.598              | +0.024           |
| 103 | 51.431             | 51.411              | +0.020           |
| 112 | 56.264             | 55.266              | -0.002           |

### **Crystal data**

Formula  $\text{Cu}_2\text{MnSnS}_4$

Crystal system Wurtzite

Space group  $P6_3mc$  (No. 186)

Unit cell dimensions  $a = b = 3.8178 \text{ \AA}$ ,  $c = 6.3163 \text{ \AA}$

### **Atomic coordinates**

| Atom | Wyck. | x/a | y/b | z/c    |
|------|-------|-----|-----|--------|
| S    | 2b    | 1/3 | 2/3 | 0      |
| Sn   | 2b    | 1/3 | 2/3 | 0.3752 |
| Mn   | 2b    | 1/3 | 2/3 | 0.3752 |
| Cu   | 2b    | 1/3 | 2/3 | 0.3752 |

Note that  $\text{Cu}^+$ ,  $\text{Mn}^{2+}$ , and  $\text{Sn}^{4+}$  ions occupy the same position, and the occupancy possibilities of  $\text{Cu}^+$ ,  $\text{Mn}^{2+}$ , and  $\text{Sn}^{4+}$  are 1/2, 1/4 and 1/4, respectively.

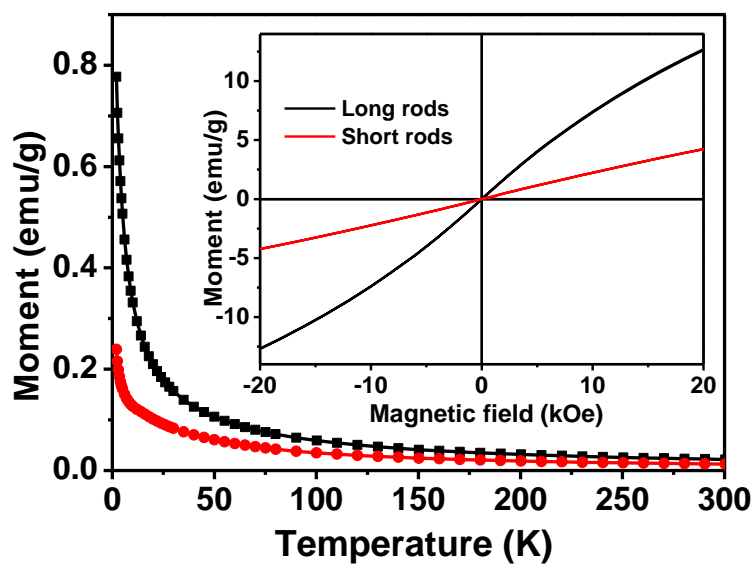

*Figure S2.* Temperature dependence of the magnetization for wurtzite  $\text{Cu}_2\text{MnSnS}_4$  nanocrystals with different aspect ratios, measured in a magnetic field of 1000 Oe; Inset: The field dependence of the magnetization for the same samples at 2 K.

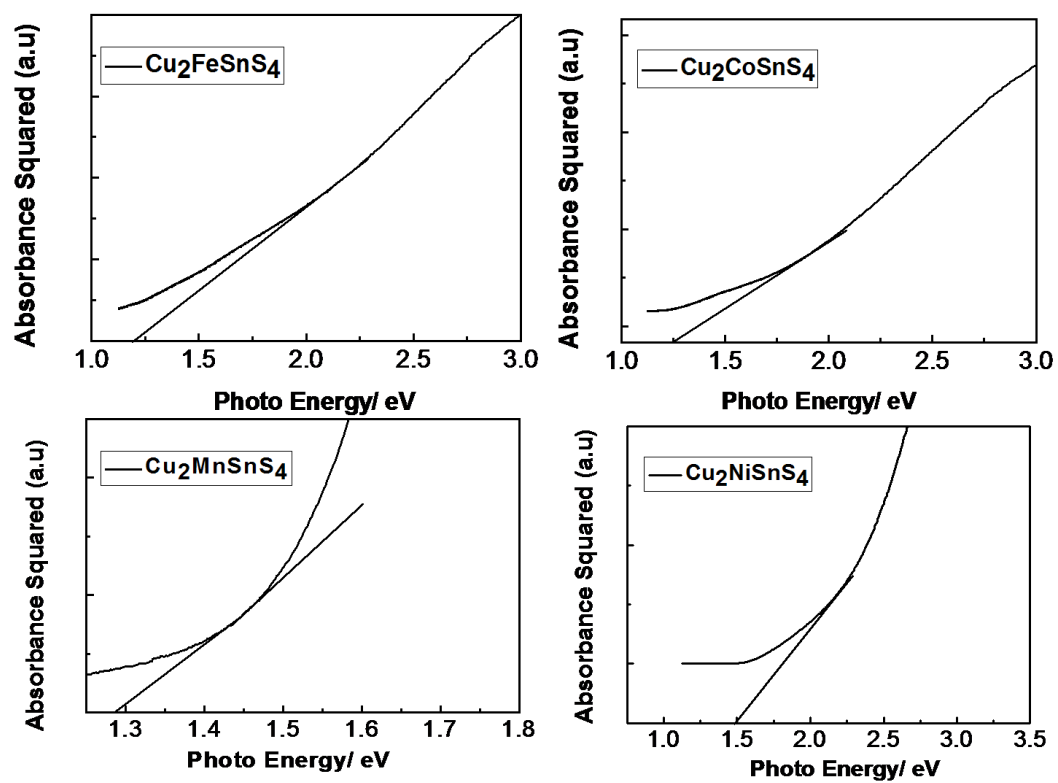

**Figure S3.** Plots of  $(abs^2)$  vs  $h\nu$  for the Cu<sub>2</sub>MSnS<sub>4</sub> (M=Co, Fe, Ni, Mn) nanocrystals with the band gap

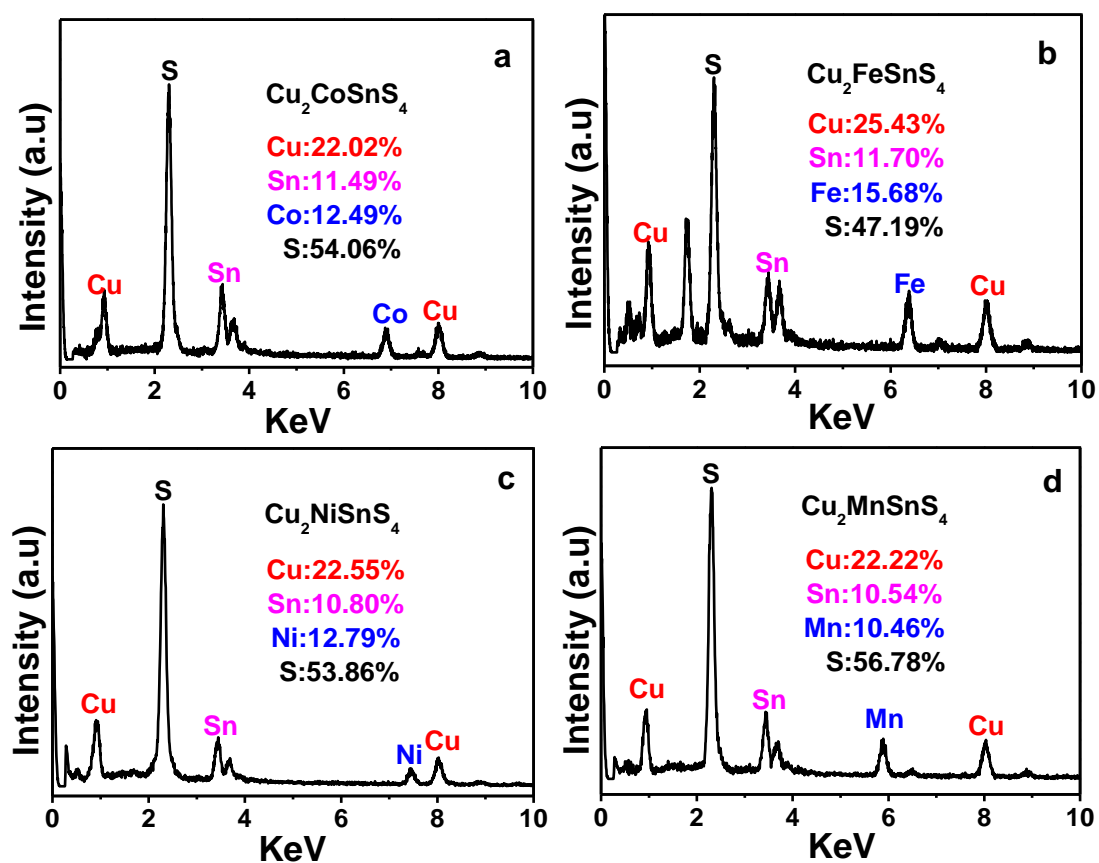

**Figure S4.** EDS spectra and chemical compositions (atomic percent) of zincblende and wurtzite  $\text{Cu}_2\text{MSnS}_4$  (M=Co, Fe, Ni, Mn) nanocrystals.



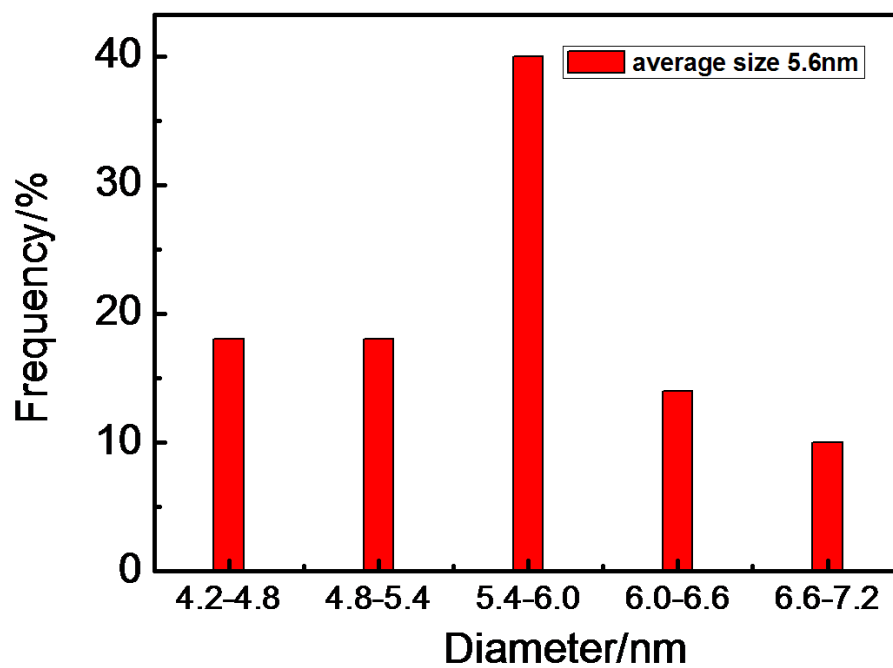

*Figure S5.* Size distribution of  $\text{Cu}_2\text{FeSnS}_4$  nanocrystals

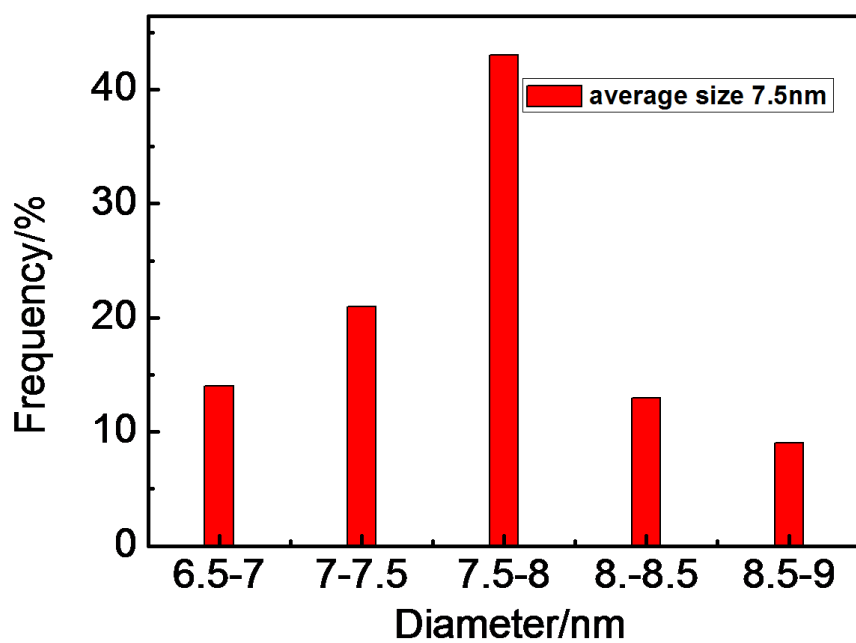

*Figure S6.* Size distribution of  $\text{Cu}_2\text{CoSnS}_4$  nanocrystals

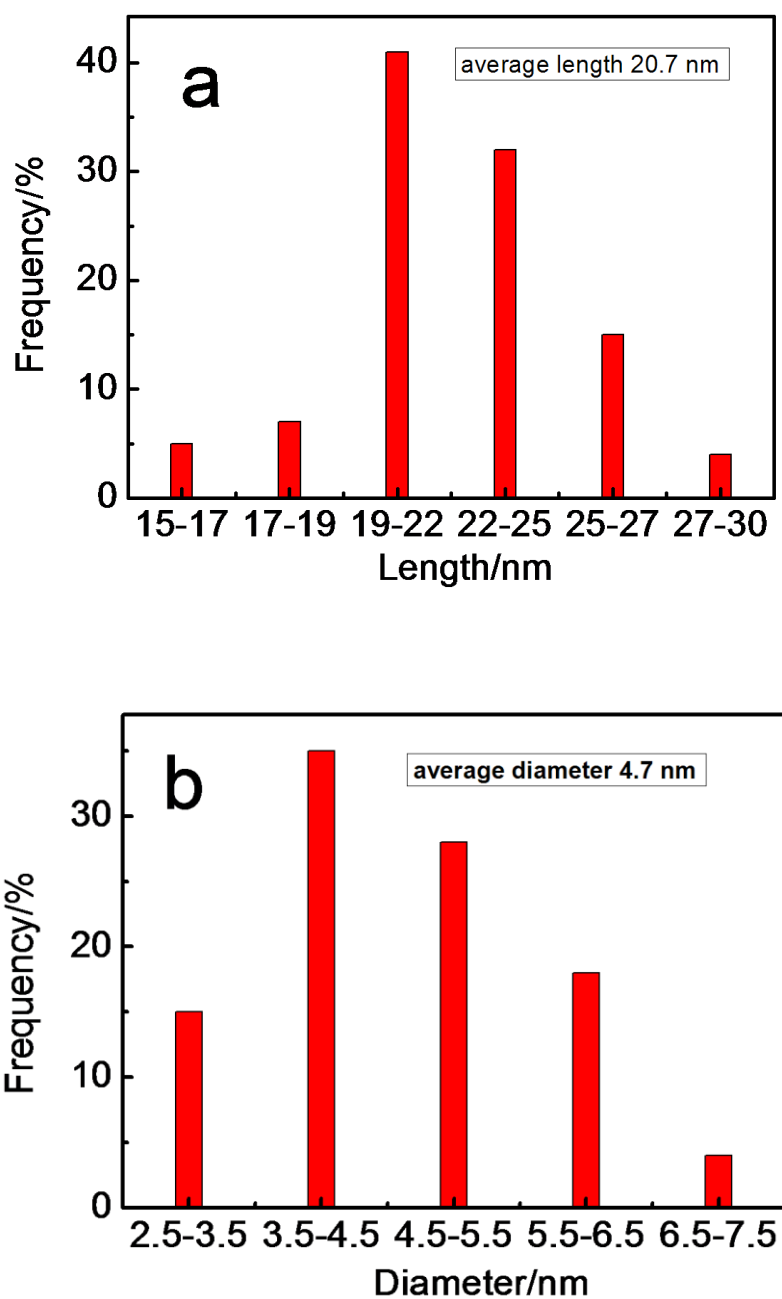

**Figure S7.** Size distribution of  $\text{Cu}_2\text{MnSnS}_4$  nanorods with an aspect ratio of 4.4 (a: length distribution; b: diameter distribution).

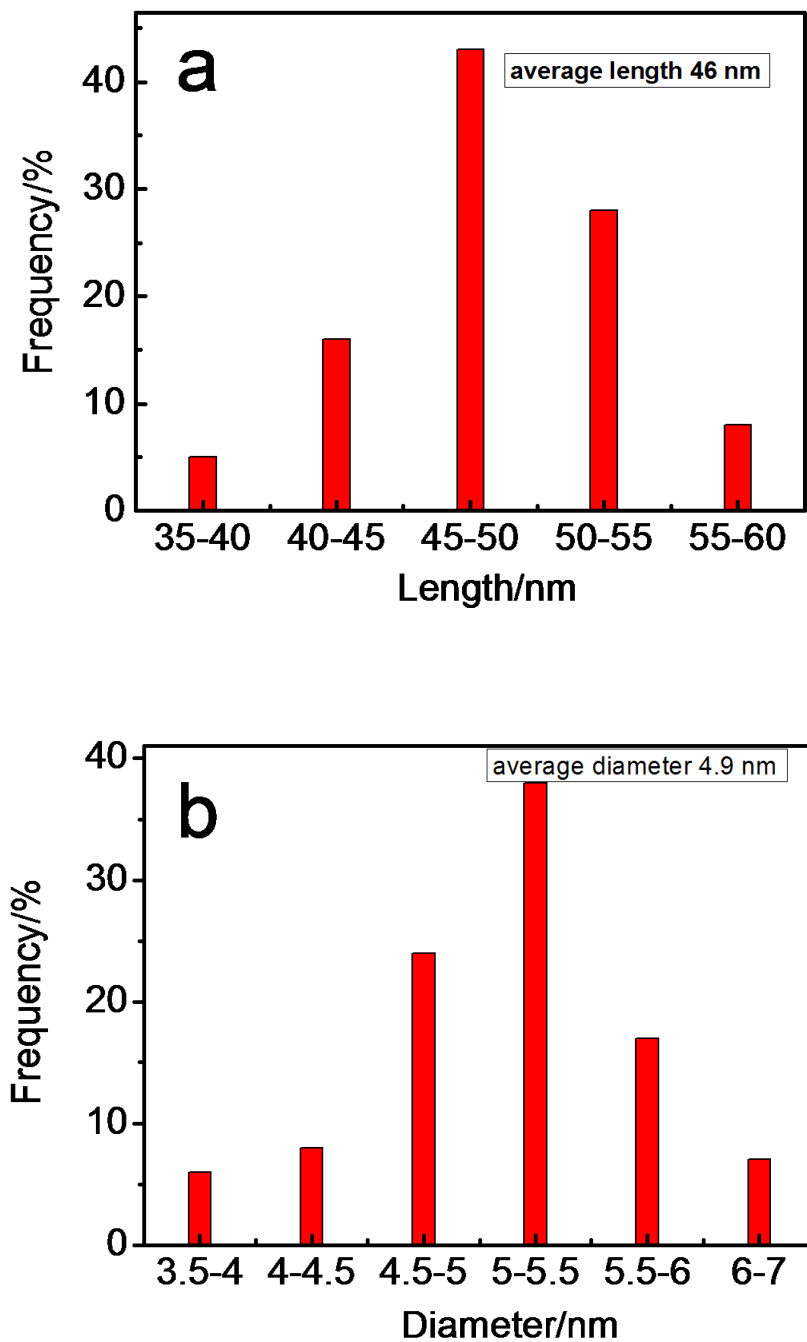

*Figure S8.* Size distribution of  $\text{Cu}_2\text{MnSnS}_4$  nanorods with an aspect ratio of 9.4 (a: length distribution; b: diameter distribution).
